# Supplementary material for: Nano-Hydroxyapatite/PLGA Mixed Scaffolds as a Tool for Drug Development and to Study Metastatic Prostate Cancer in the Bone
Source: Pharmaceutics. 2023 Jan 11;15(1):242. doi: 10.3390/pharmaceutics15010242 (PMC9864166; doi:10.3390/pharmaceutics15010242)
Supplement: Supplementary file 1 [file pharmaceutics-15-00242-s001.zip]

Archive with 7 entries (7 files):
- Figure S1.jpg
- Figure S2.jpg
- Figure S3.jpg
- Figure S4.jpg
- Figure S5.jpg
- Figure S6.jpg
- pharmaceutics-2116870-supplementary.pdf
